# Supplementary material
Source: publisher figshare collection journal article supplement (https://plos.figshare.com/articles/dataset/_/6185480)
Supplement: Supplementary file [file 1]

BA9 lineage of Respiratory Syncytial Virus from across the Globe and its Evolutionary Dynamics

Md Shakir Hussain Haider, Wajihul Hasan Khan, Farah Deebea, Sher Ali, Anwar Ahmed, Irshad H Naqvi, Ravins Dohare, Hytham A. Alsenaidy, Abdulrahman M. Alsenaidy, Shobha Broor, Shama Parveen

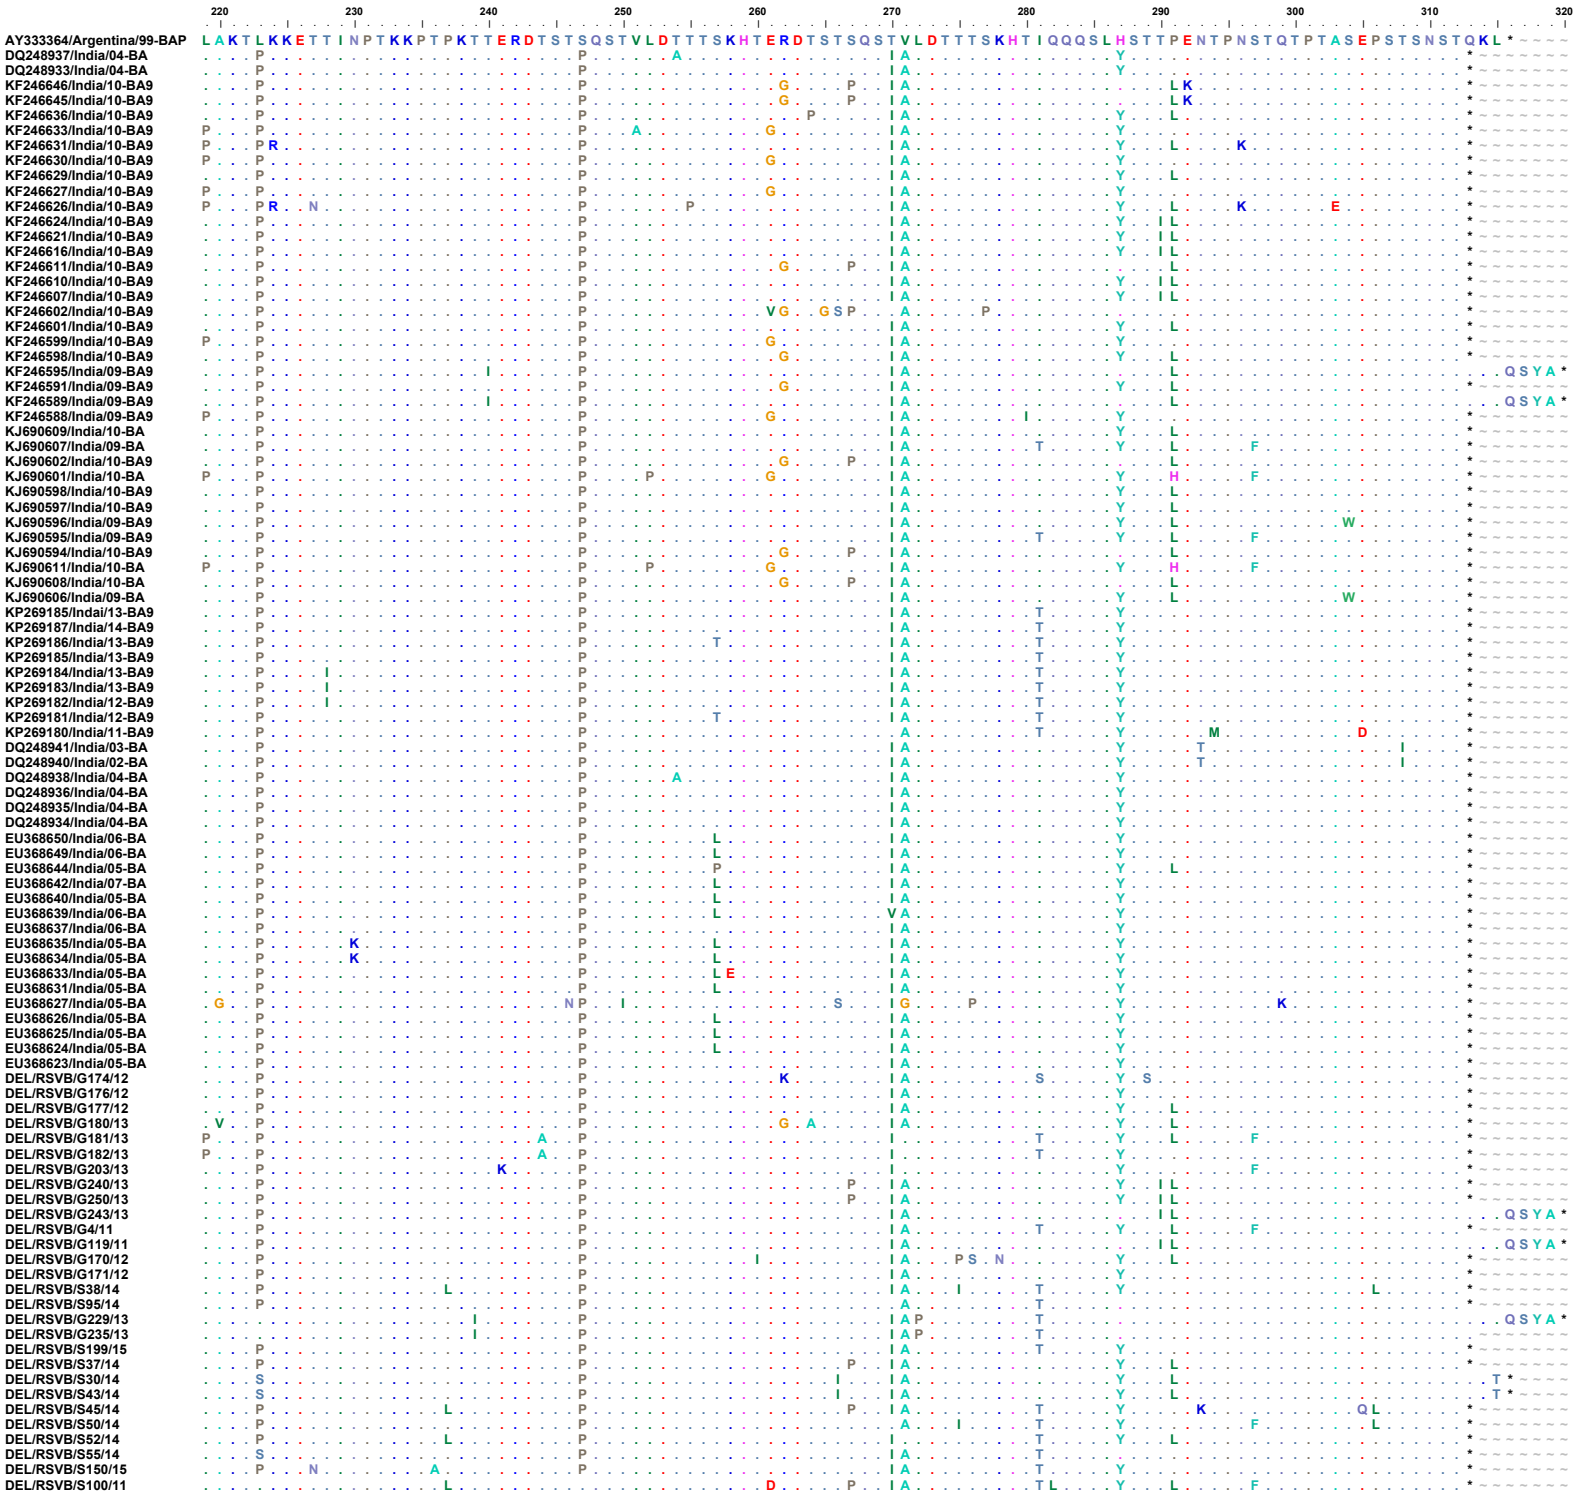

Supplementary Figure S1
