# Supplementary material
Source: publisher figshare collection journal article supplement (https://plos.figshare.com/articles/dataset/_/6185480)

BA9 lineage of Respiratory Syncytial Virus from across the Globe and its Evolutionary Dynamics  
Md Shakir Hussain Haider, Wajihul Hasan Khan, Farah Deeba, Sher Ali, Anwar Ahmed, Irshad H Naqvi, Ravins Dohare, Hytham A. Asemaidy, Abdulrahman M. Asemaidy, Shobha Broor, Shama Parveen

Supplementary Figure S3

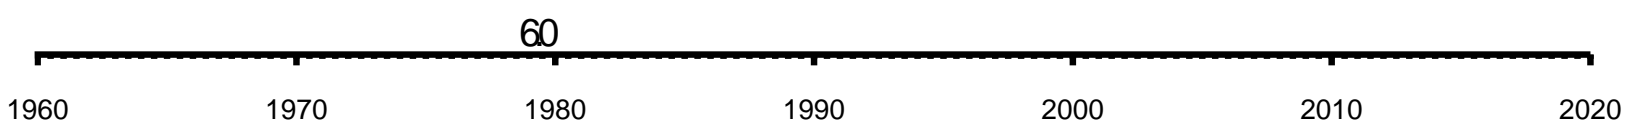

Supplement: Supplementary file [file 1]
